# Supplementary material
Source: PubMed Central journal article supplement (PMC6482997)
Supplement: jciinsight-4-125326-s209.pdf [file jciinsight-4-125326-s209.pdf]

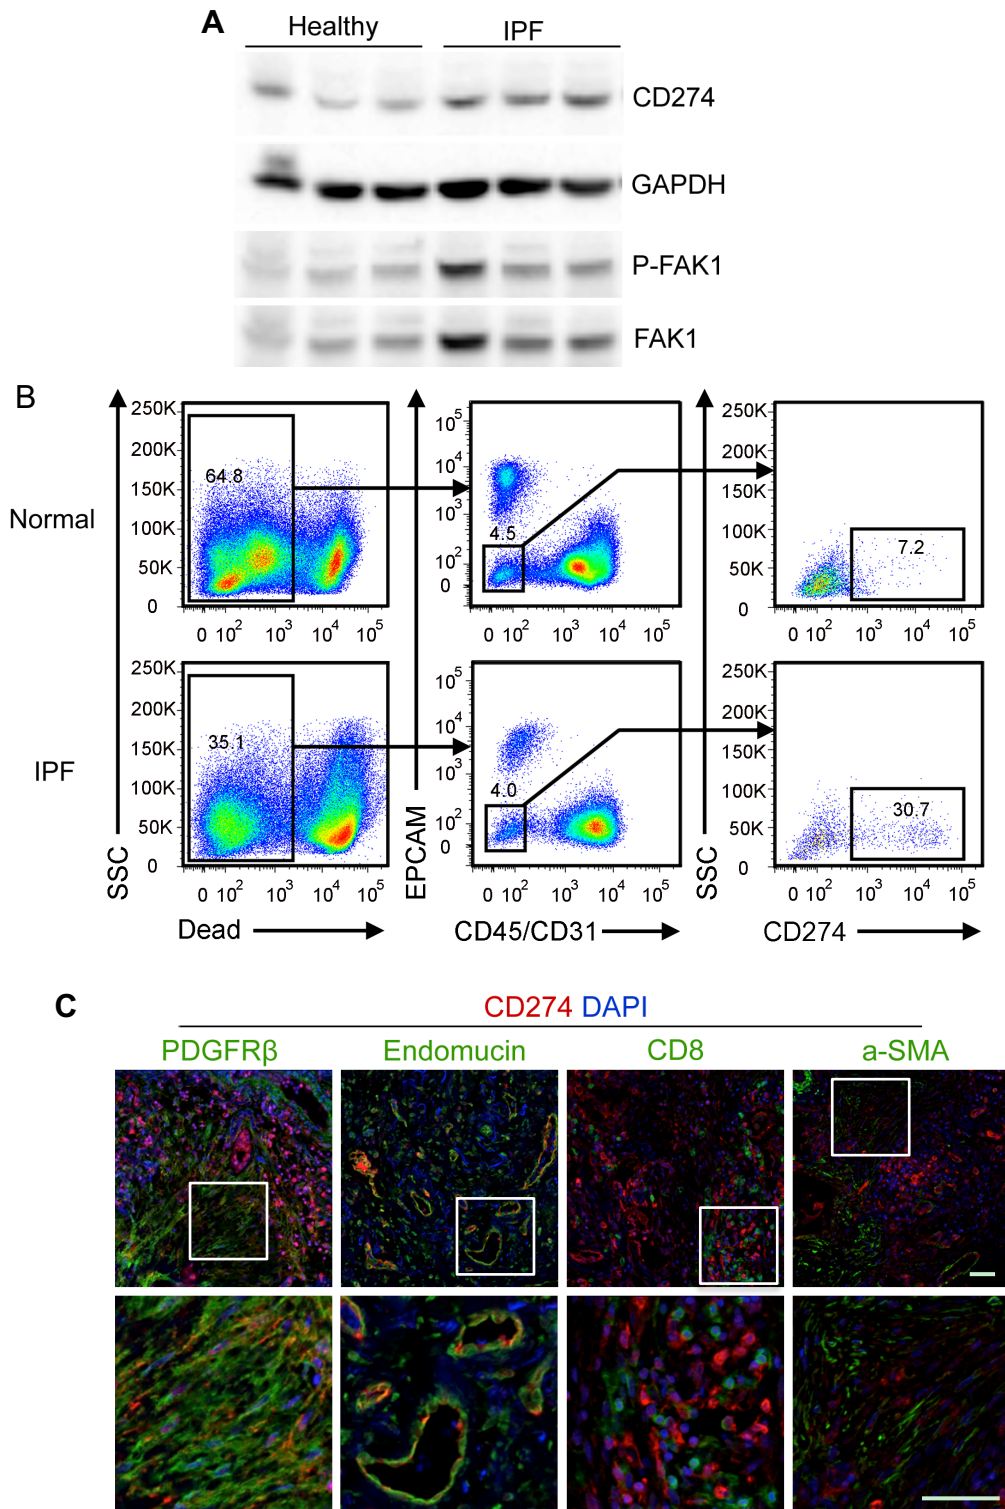

**Supplementary Figure 1.** (A) Western blot analyses of CD274, p-FAK1, FAK1 and GAPDH in healthy and IPF lung fibroblasts. GAPDH served as equal loading control. (B) Flow cytometry analysis of CD274 expression in CD31- CD45- EPCAM- mesenchymal cells. (C) Immuno-co-staining of CD274 and PDGFR $\beta$ , Endomucin, CD8 $\alpha$  or  $\alpha$ -SMA. Scale bar: 50  $\mu$ m.

**A**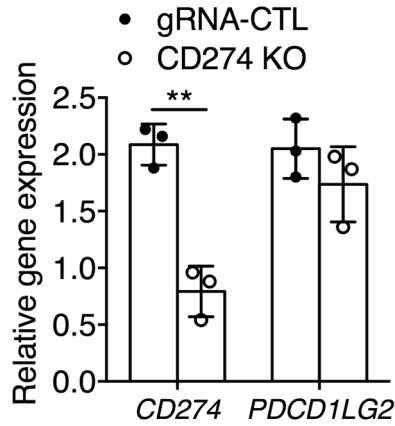**B**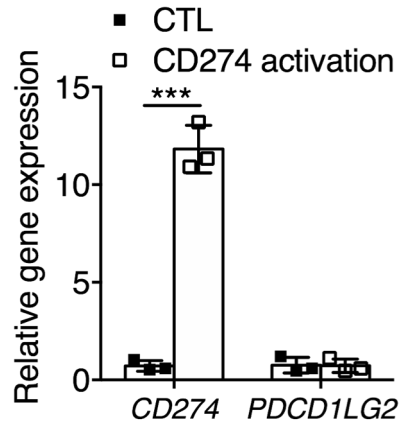

**Supplementary Figure 2.** KO and activation of CD274 in IPF lung fibroblasts. Gene expression of CD274, PDCD1LG2 in IPF lung fibroblasts after CD274 KO (A) or activation (B) by qRT-PCR. Data are mean  $\pm$  sem (n = 3 per group). \*\* $P < 0.01$ , \*\*\* $P < 0.001$  by Two-way ANOVA.

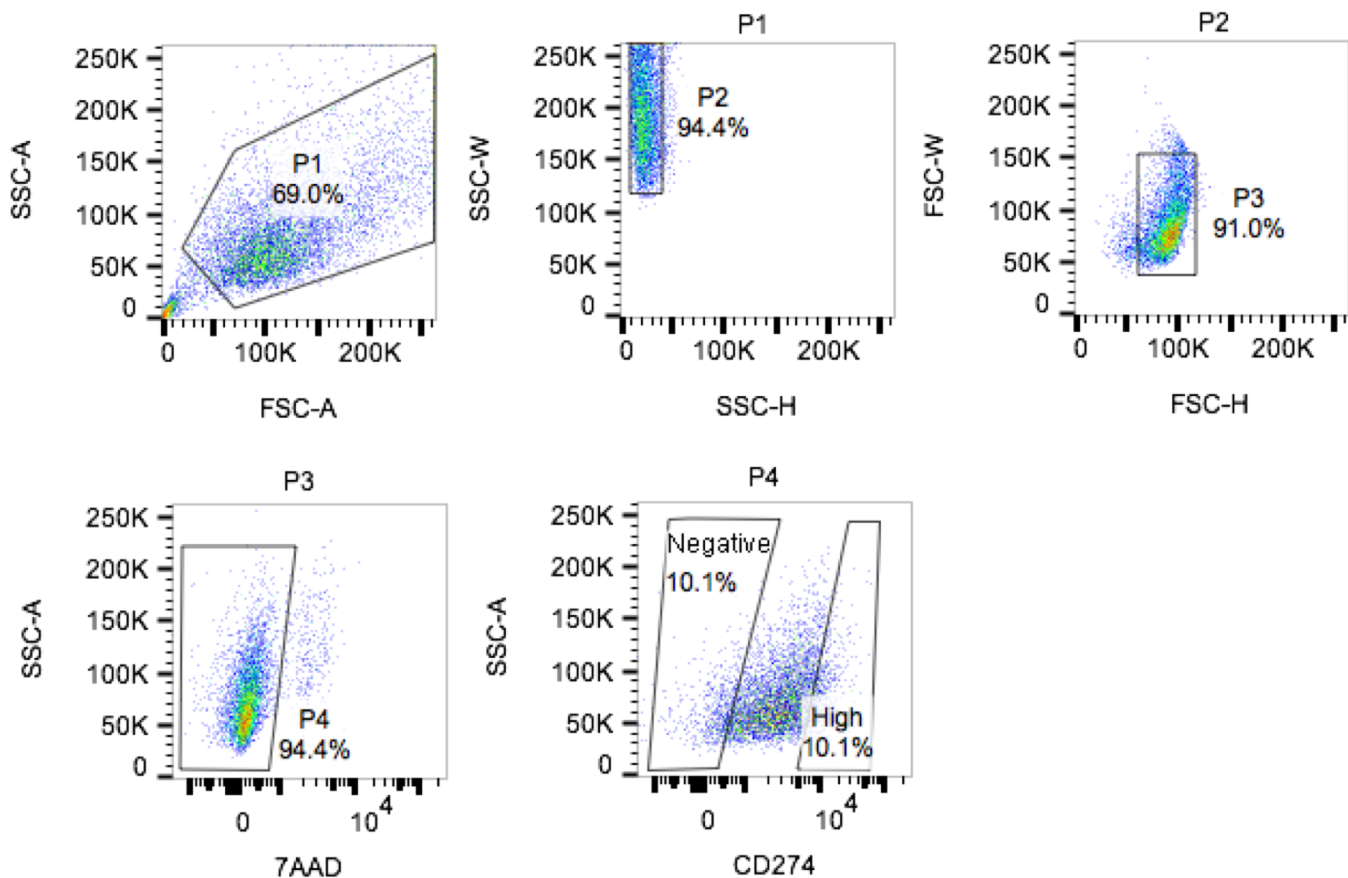

**Supplementary Figure 3.** Fluorescence-activated cell sorting of CD274<sup>High</sup> and CD274<sup>neg</sup> fibroblasts. 7-aminoactinomycin D (7AAD) was used to exclude of nonviable cells.

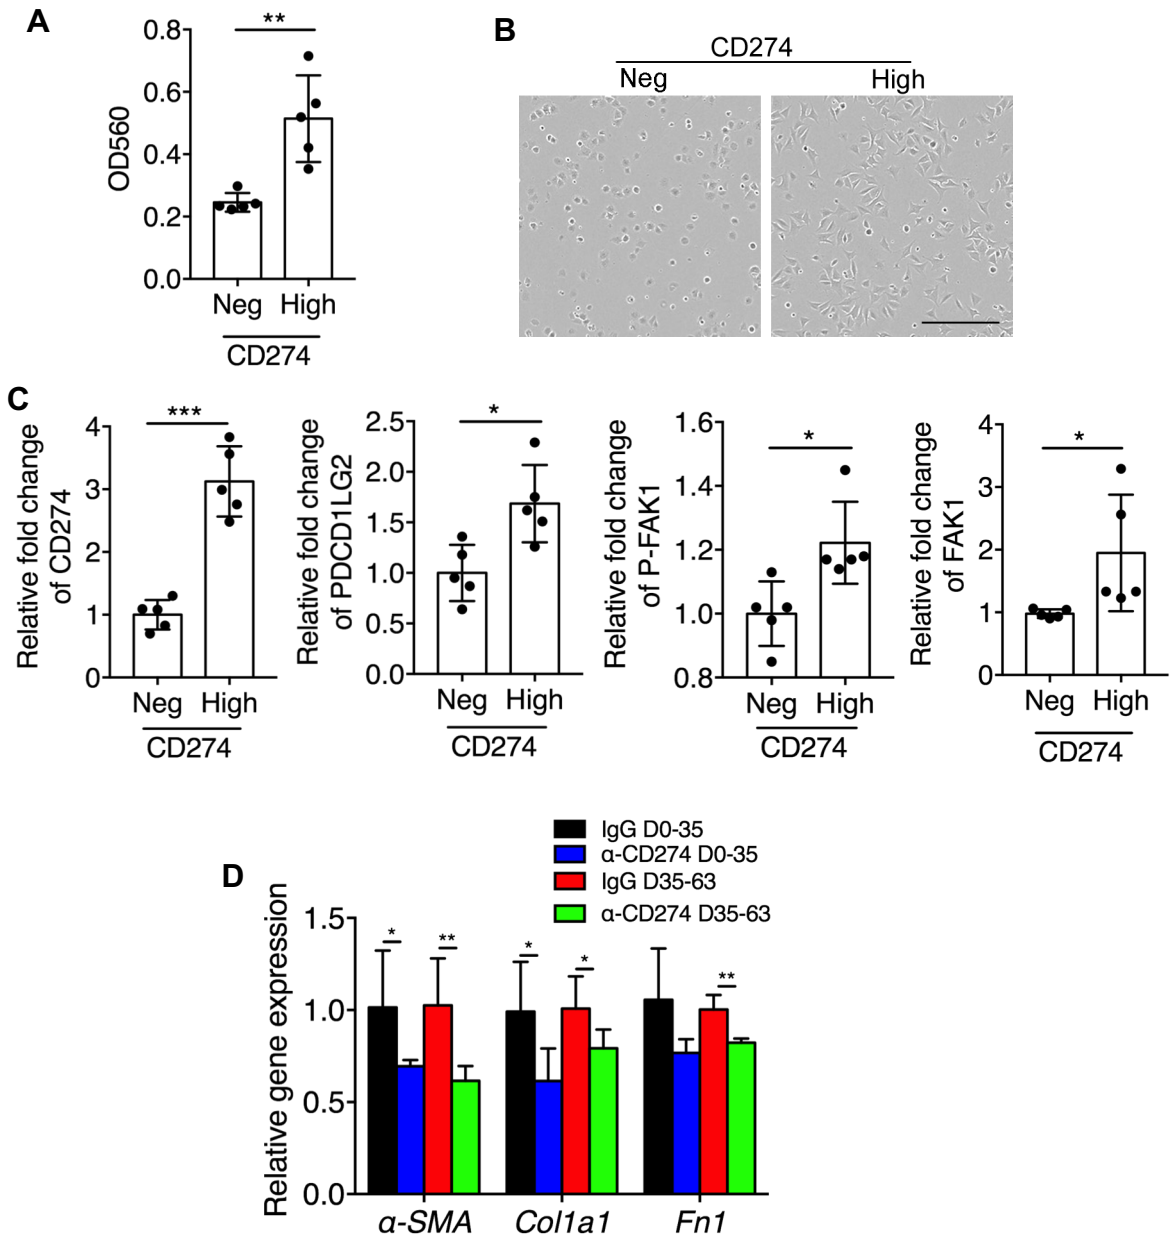

**Supplementary Figure 4.** Cell adhesion assay of CD274<sup>Neg</sup> and CD274<sup>High</sup> IPF lung fibroblasts and expression of fibrotic markers in the lungs of the mice received IgG and  $\alpha$ -CD274 after CD274<sup>High</sup> fibroblasts injection: (A) Col IV-mediated Cell Adhesion. CD274<sup>High</sup> and CD274<sup>neg</sup> cells were harvested by flow sorting. Then these cells were allowed to attach to Col IV coated 48-well plate for 1 hr at 100,000 cells/well in serum free medium. Adherent cells were stained with and quantified at OD 560nm after extraction. (B) Representative image of CD274<sup>High</sup> and CD274<sup>Neg</sup> cells after 1hr culture on Col IV coated plate. Scale bar: 300  $\mu$ m. (C) Quantification of p-FAK1, FAK1, CD274 and PDCD1LG2 protein expression level in CD274 negative and high lung fibroblasts. D) Relative expression of  $\alpha$ -SMA, *Col1a1* and *Fn1* by RT-PCR. Throughout, data are mean  $\pm$  sem (n = 5 per group). \* P<0.05, \*\* P<0.01 by student's t test.

Supplementary Table 1: Top 50 up-regulated genes in invasive fibroblasts

|    | ID              | geneName         | logFC       | Fold Change | PValue    | FDR       |
|----|-----------------|------------------|-------------|-------------|-----------|-----------|
| 1  | ENSG00000240386 | <i>LCE1F</i>     | 2.75223657  | 6.737608357 | 8.17E-30  | 7.11E-28  |
| 2  | ENSG00000138623 | <i>SEMA7A</i>    | 2.710360098 | 6.544849865 | 9.32E-101 | 3.19E-97  |
| 3  | ENSG00000212724 | <i>KRTAP2-3</i>  | 2.577089352 | 5.967345676 | 1.85E-36  | 2.79E-34  |
| 4  | ENSG00000120217 | <i>CD274</i>     | 2.566132578 | 5.922197393 | 9.58E-60  | 7.57E-57  |
| 5  | ENSG00000213417 | <i>KRTAP2-4</i>  | 2.342505916 | 5.071828336 | 9.46E-17  | 2.16E-15  |
| 6  | ENSG00000180914 | <i>OXTR</i>      | 2.336833403 | 5.051925637 | 4.17E-37  | 6.48E-35  |
| 7  | ENSG00000078401 | <i>EDN1</i>      | 2.334215058 | 5.042765221 | 7.88E-23  | 3.40E-21  |
| 8  | ENSG00000214518 | <i>KRTAP2-2</i>  | 2.180094259 | 4.53183162  | 9.24E-15  | 1.66E-13  |
| 9  | ENSG00000187173 | <i>LCE2A</i>     | 2.154248495 | 4.451367135 | 2.84E-17  | 6.99E-16  |
| 10 | ENSG00000170961 | <i>HAS2</i>      | 2.081307081 | 4.231904528 | 1.49E-50  | 6.64E-48  |
| 11 | ENSG00000095752 | <i>IL11</i>      | 2.07346639  | 4.208967559 | 1.94E-18  | 5.44E-17  |
| 12 | ENSG00000113070 | <i>HBEGF</i>     | 2.01446962  | 4.040320164 | 9.41E-40  | 1.86E-37  |
| 13 | ENSG00000164283 | <i>ESMI</i>      | 1.970071515 | 3.917875396 | 2.33E-48  | 8.55E-46  |
| 14 | ENSG00000163273 | <i>NPPC</i>      | 1.966400261 | 3.907918178 | 4.60E-28  | 3.35E-26  |
| 15 | ENSG00000242550 | <i>SERPINB10</i> | 1.941935834 | 3.842208564 | 2.58E-33  | 3.24E-31  |
| 16 | ENSG00000142871 | <i>CYR61</i>     | 1.888455197 | 3.7023857   | 8.69E-30  | 7.50E-28  |
| 17 | ENSG00000197632 | <i>SERPINB2</i>  | 1.874314726 | 3.666274295 | 3.24E-27  | 2.18E-25  |
| 18 | ENSG00000131016 | <i>AKAP12</i>    | 1.821182941 | 3.533708271 | 5.18E-106 | 2.66E-102 |
| 19 | ENSG00000106366 | <i>SERPINE1</i>  | 1.81985067  | 3.530446538 | 1.46E-32  | 1.66E-30  |
| 20 | ENSG00000139211 | <i>AMIGO2</i>    | 1.698925951 | 3.246591681 | 2.64E-25  | 1.48E-23  |
| 21 | ENSG00000134259 | <i>NGF</i>       | 1.687485205 | 3.220947632 | 1.38E-22  | 5.77E-21  |
| 22 | ENSG00000181751 | <i>C5orf30</i>   | 1.660047093 | 3.160268404 | 3.31E-18  | 9.00E-17  |
| 23 | ENSG00000118523 | <i>CTGF</i>      | 1.648933175 | 3.136016553 | 3.48E-21  | 1.28E-19  |
| 24 | ENSG00000140379 | <i>BCL2A1</i>    | 1.598976094 | 3.029282436 | 6.70E-15  | 1.21E-13  |
| 25 | ENSG00000127124 | <i>HIVEP3</i>    | 1.591009915 | 3.012601637 | 1.95E-48  | 7.43E-46  |
| 26 | ENSG00000128567 | <i>PODXL</i>     | 1.583691253 | 2.99735768  | 4.79E-30  | 4.32E-28  |
| 27 | ENSG00000132688 | <i>NES</i>       | 1.507776322 | 2.843713892 | 2.87E-16  | 6.13E-15  |
| 28 | ENSG00000169429 | <i>CXCL8</i>     | 1.470696158 | 2.771556001 | 4.41E-08  | 3.00E-07  |
| 29 | ENSG00000134775 | <i>FHOD3</i>     | 1.450951596 | 2.733883178 | 5.11E-36  | 7.49E-34  |
| 30 | ENSG00000113578 | <i>FGF1</i>      | 1.449315153 | 2.730783903 | 2.07E-34  | 2.73E-32  |
| 31 | ENSG00000135074 | <i>ADAMI9</i>    | 1.423047766 | 2.681513963 | 2.26E-39  | 4.14E-37  |
| 32 | ENSG00000243444 | <i>PALM2</i>     | 1.421422775 | 2.678495319 | 1.10E-34  | 1.51E-32  |
| 33 | ENSG00000103489 | <i>XYLT1</i>     | 1.419491363 | 2.674911875 | 3.07E-25  | 1.71E-23  |
| 34 | ENSG00000087494 | <i>PTHLH</i>     | 1.418229352 | 2.672572995 | 1.31E-11  | 1.62E-10  |
| 35 | ENSG00000122641 | <i>INHBA</i>     | 1.417335032 | 2.670916791 | 1.56E-22  | 6.50E-21  |
| 36 | ENSG00000169436 | <i>COL22A1</i>   | 1.402470497 | 2.643538792 | 8.27E-22  | 3.23E-20  |
| 37 | ENSG00000117525 | <i>F3</i>        | 1.393307634 | 2.626802319 | 5.99E-53  | 3.42E-50  |
| 38 | ENSG00000070404 | <i>FSTL3</i>     | 1.367627631 | 2.580458861 | 1.06E-41  | 2.42E-39  |
| 39 | ENSG00000090530 | <i>LEPREL1</i>   | 1.36290476  | 2.572025169 | 2.04E-32  | 2.27E-30  |
| 40 | ENSG00000154447 | <i>SH3RF1</i>    | 1.361788135 | 2.570035228 | 1.02E-47  | 3.38E-45  |
| 41 | ENSG00000176170 | <i>SPHK1</i>     | 1.34425329  | 2.538987497 | 1.41E-16  | 3.13E-15  |
| 42 | ENSG00000167772 | <i>ANGPTL4</i>   | 1.332145878 | 2.517768919 | 3.80E-34  | 4.95E-32  |
| 43 | ENSG00000151136 | <i>BTBD11</i>    | 1.312979334 | 2.484540973 | 5.96E-38  | 9.87E-36  |
| 44 | ENSG00000104722 | <i>NEFM</i>      | 1.310949826 | 2.481048307 | 1.16E-21  | 4.45E-20  |
| 45 | ENSG00000144583 | 42433            | 1.306771612 | 2.473873296 | 5.07E-17  | 1.21E-15  |
| 46 | ENSG00000221852 | <i>KRTAPI-5</i>  | 1.301583043 | 2.464992135 | 1.40E-06  | 7.12E-06  |
| 47 | ENSG00000108854 | <i>SMURF2</i>    | 1.288268896 | 2.442348199 | 1.05E-48  | 4.15E-46  |
| 48 | ENSG00000197646 | <i>PDCD1LG2</i>  | 1.281386289 | 2.430724336 | 3.79E-41  | 8.47E-39  |
| 49 | ENSG00000170681 | <i>MURC</i>      | 1.254144784 | 2.385257109 | 1.14E-19  | 3.61E-18  |
| 50 | ENSG00000139174 | <i>PRICKLE1</i>  | 1.227554205 | 2.341696663 | 5.35E-35  | 7.42E-33  |

Supplementary Table 2: Checkpoint gene expression

| Gene expression     | Stimulatory checkpoint molecules | Gene expression |          | Inhibitory checkpoint molecules |
|---------------------|----------------------------------|-----------------|----------|---------------------------------|
|                     |                                  | non-invasive    | invasive |                                 |
| N/A                 | <i>CD27</i>                      | 14.338          | 38.375   | <i>CD274</i>                    |
| N/A                 | <i>CD28</i>                      | 30.475          | 47.075   | <i>PDCD1LG2</i>                 |
| N/A                 | <i>CD40</i>                      | 56.593          | 86.603   | <i>RGMB</i>                     |
| N/A                 | <i>IL2RB</i>                     | N/A             |          | <i>PDCD1</i>                    |
| N/A                 | <i>TNFRSF9</i>                   | N/A             |          | <i>ADORA2A</i>                  |
| N/A                 | <i>TNFRSF4</i>                   | No change       |          | <i>CD276</i>                    |
| N/A                 | <i>TNFSF18</i>                   | N/A             |          | <i>VTCN1</i>                    |
| N/A                 | <i>ICOS</i>                      | N/A             |          | <i>BTLA</i>                     |
|                     |                                  | N/A             |          | <i>CTLA-4</i>                   |
| N/A, not available. |                                  | N/A             |          | <i>IDO1</i>                     |
|                     |                                  | N/A             |          | <i>KIR3DL1</i>                  |
|                     |                                  | N/A             |          | <i>LAG3</i>                     |
|                     |                                  | N/A             |          | <i>HAVCR2</i>                   |
|                     |                                  | N/A             |          | <i>C10orf54</i>                 |

Supplementary Table 3. Patient sample information

| Sample ID | Sex | Age | Donor Disease status | Passage of Fibroblasts for RNA-seq |
|-----------|-----|-----|----------------------|------------------------------------|
| IPF006-15 | F   | 75  | IPF                  | P3                                 |
| IPF007-14 | M   | 59  | IPF                  | P4                                 |
| IPF006-15 | F   | 75  | IPF                  | P6                                 |
| IPF011-14 | M   | 73  | IPF                  | P4                                 |
| IPF001-14 | M   | 68  | IPF                  | P4                                 |
| IPF002-14 | M   | 66  | IPF                  | P5                                 |
| IPF001-15 | M   | 72  | IPF                  | P5                                 |
| IPF003-15 | F   | 68  | IPF                  | P4                                 |
| IPF001-15 | M   | 72  | IPF                  | P3                                 |
| CC009-15  | M   | 71  | Normal               | P4                                 |
| CC007-15  | M   | 21  | Normal               | P4                                 |
| CC008-15  | F   | 50  | Normal               | P4                                 |
| CC006-14  | M   | 49  | Normal               | P5                                 |
| CC003-14  | M   | 17  | Normal               | P4                                 |
| CC003-15  | M   | 52  | Normal               | P4                                 |
| CC004-14  | M   | 66  | Normal               | P5                                 |
| CC008-14  | M   | 26  | Normal               | P5                                 |
| CC002-14  | M   | 23  | Normal               | P4                                 |
